# Supplementary material for: PNPLA1 has a crucial role in skin barrier function by directing acylceramide biosynthesis
Source: PubMed Central journal article supplement (PMC5337976; doi:10.1038/ncomms14609), 2017-03-01
Supplement: ncomms14609-s1.pdf [file ncomms14609-s1.pdf]

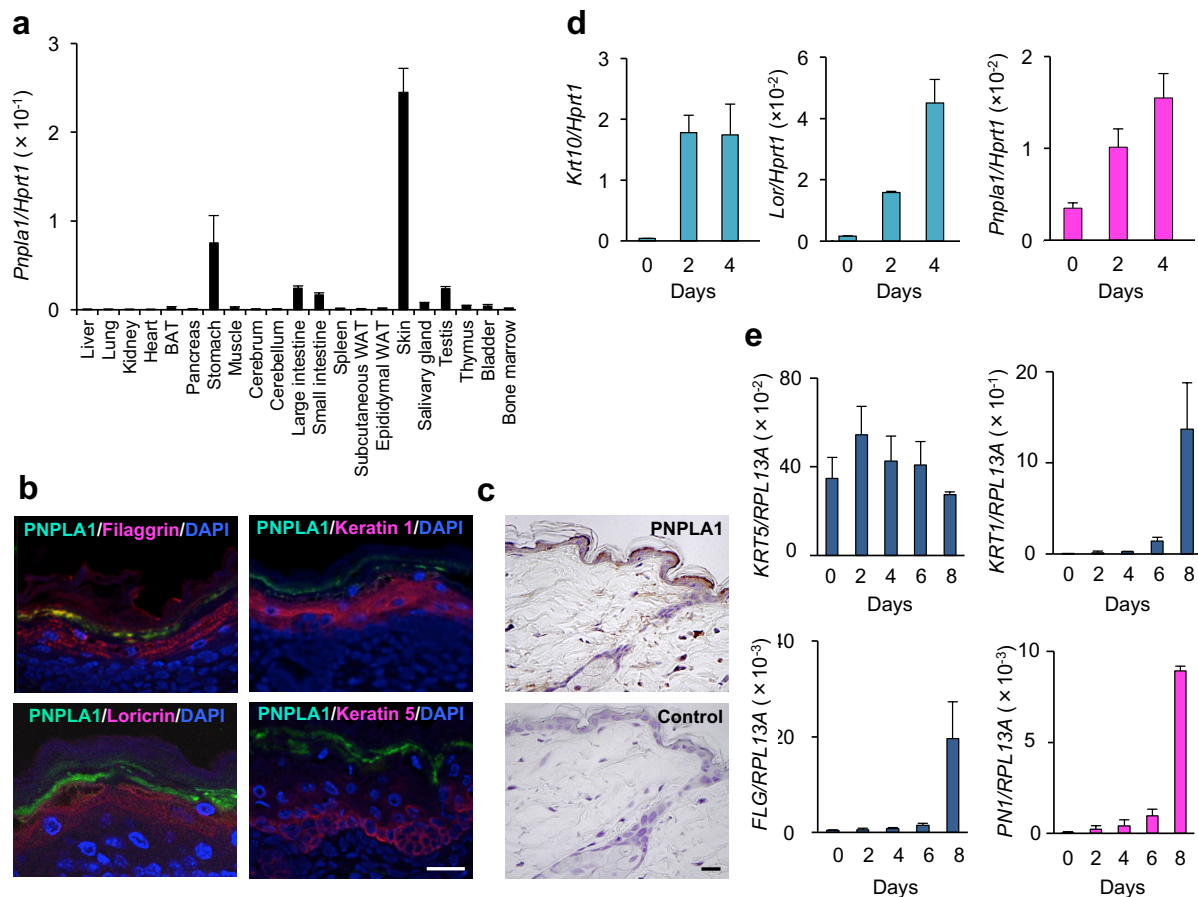

**Supplementary Fig. 1. *Pnpla1* expression in the skin and differentiated cultured keratinocytes.**

(a) qPCR analysis of *Pnpla1* expression in various tissues of 8-week-old male C57BL/6 mice, with *Hprt1* as an internal control (mean  $\pm$  s.e.m.,  $n = 6$  animals). (b) Immunofluorescent staining of newborn mouse skin sections with antibodies specific for PNPLA1 (green) and filaggrin, loricrin, keratin 1 or keratin 5 (red). Nuclei were counterstained with DAPI (blue). (c) Immunohistochemical staining of the back skin sections of adult C57BL/6 mice (8-week-old) with anti-PNPLA1 antibody (upper panel) or isotype-matched control antibody (lower panel). The sections were counterstained with hematoxylin. (d, e) qPCR analysis of expression levels of *Pnpla1*/*PNPLA1* and keratinocyte differentiation markers in mouse (d) and human (e) keratinocytes in culture with 1.2 mM  $\text{CaCl}_2$  for the indicated periods, with *Hprt1* and *RPL13A*, respectively, as internal controls (mean  $\pm$  s.e.m.,  $n = 3$ ). Results are representative of two or three independent experiments. Scale bar, 20  $\mu\text{m}$ .

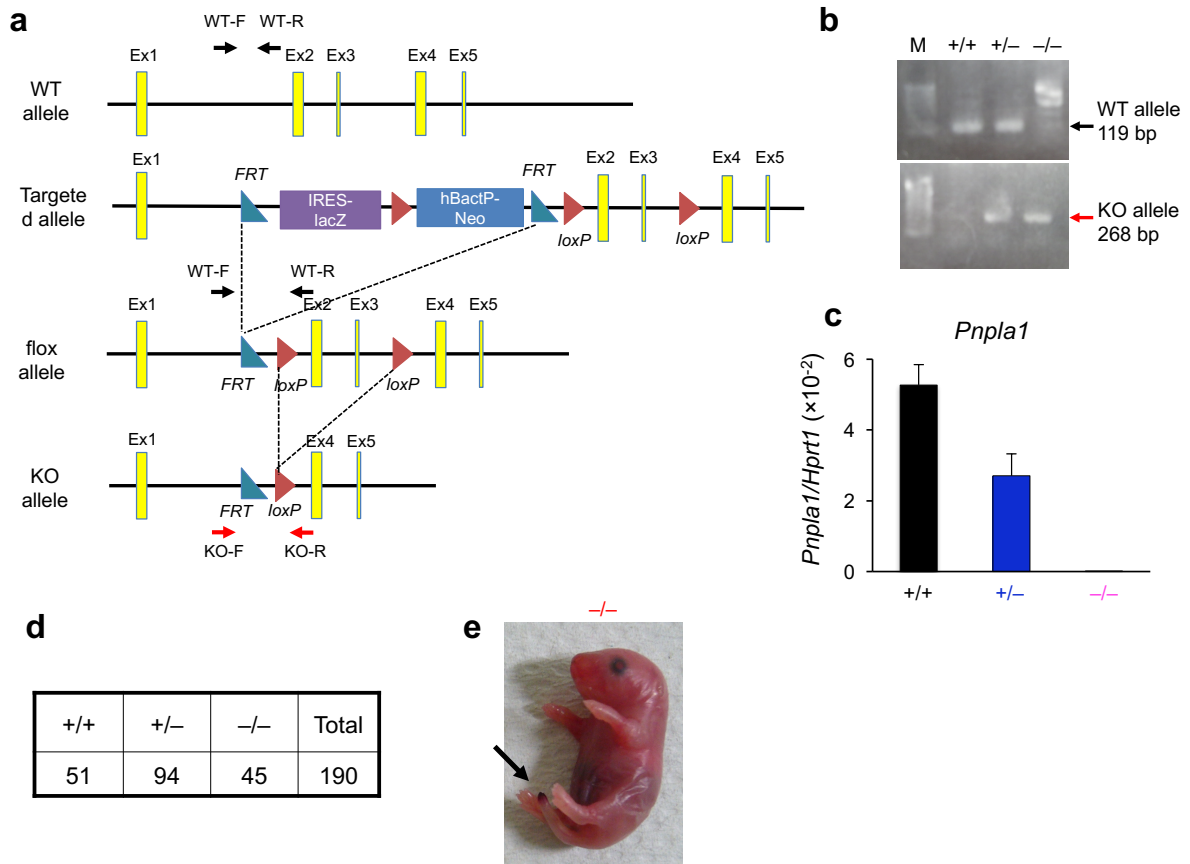

**Supplementary Fig. 2. Generation of *Pnpla1*-deficient mice.**

(a) Strategy of *Pnpla1* gene targeting. In the targeted allele, exons 2 and 3 were flanked by *loxP* sites, and the *IRES-LacZ* and *Neo* cassettes flanked by *FRT* sites were inserted between exons 1 and 2. *FRT* and *loxP* sites are depicted as blue and red triangles, respectively. The positions of primers for genotyping PCR (arrows labeled WT-F, WT-R, KO-F, and KO-R) are indicated. *Neo*, neomycin phosphotransferase gene. (b) PCR genotyping of tail DNA, amplifying 119-bp and 268-bp products of WT and KO alleles, respectively. (c) qPCR analysis of *Pnpla1* mRNA expression in the skin of *Pnpla1*<sup>+/+</sup>, *Pnpla1*<sup>+/-</sup> and *Pnpla1*<sup>-/-</sup> mice at P0 (mean  $\pm$  s.e.m., n = 5 animals per group). (d) Frequencies of *Pnpla1* genotypes in pups derived from intercrosses between heterozygous mice. (e) Tail tip necrosis (arrow) in *Pnpla1*<sup>-/-</sup> newborn mice. Representative (b, c, e) and compiled (d) results from multiple experiments are shown.

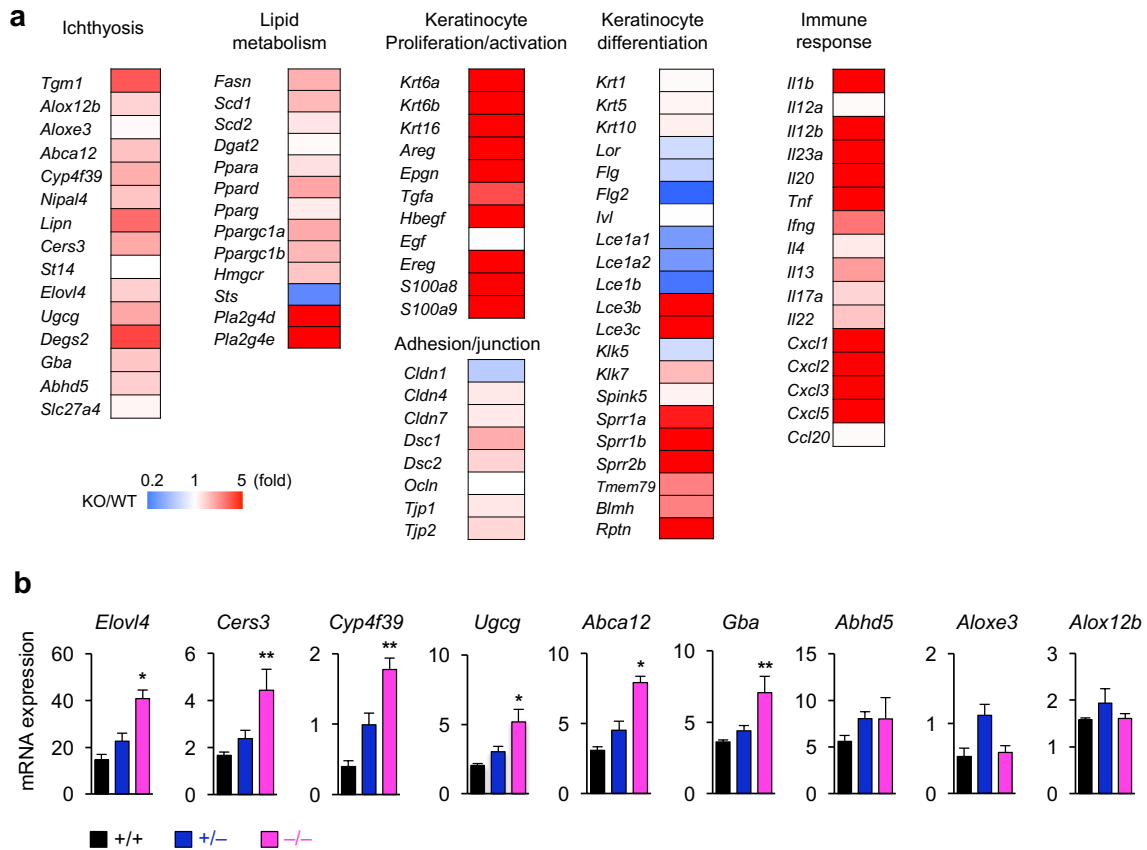

**Supplementary Fig. 3. Changes in gene expression in *Pnpla1*<sup>-/-</sup> epidermis.**

(a) Altered expression profiles of genes associated with ichthyosis, lipid metabolism, keratinocyte proliferation/activation, adhesion/junction, keratinocyte differentiation, and immune response in *Pnpla1*<sup>-/-</sup> (KO) epidermis relative to *Pnpla1*<sup>+/+</sup> (WT) epidermis at P0, as assessed by DNA microarray analysis. Fold changes (KO/WT) are represented by color. Equal amounts of total RNA pooled from six mice for each genotype were used. (b) qPCR analysis of genes for epidermal ceramide metabolism in *Pnpla1*<sup>+/+</sup>, *Pnpla1*<sup>+/-</sup> and *Pnpla1*<sup>-/-</sup> skin at P0 (mean ± s.e.m., n = 5 animals per genotype; \**P* < 0.05 and \*\**P* < 0.01 versus *Pnpla1*<sup>+/+</sup> mice). Representative results from two independent experiments are shown.

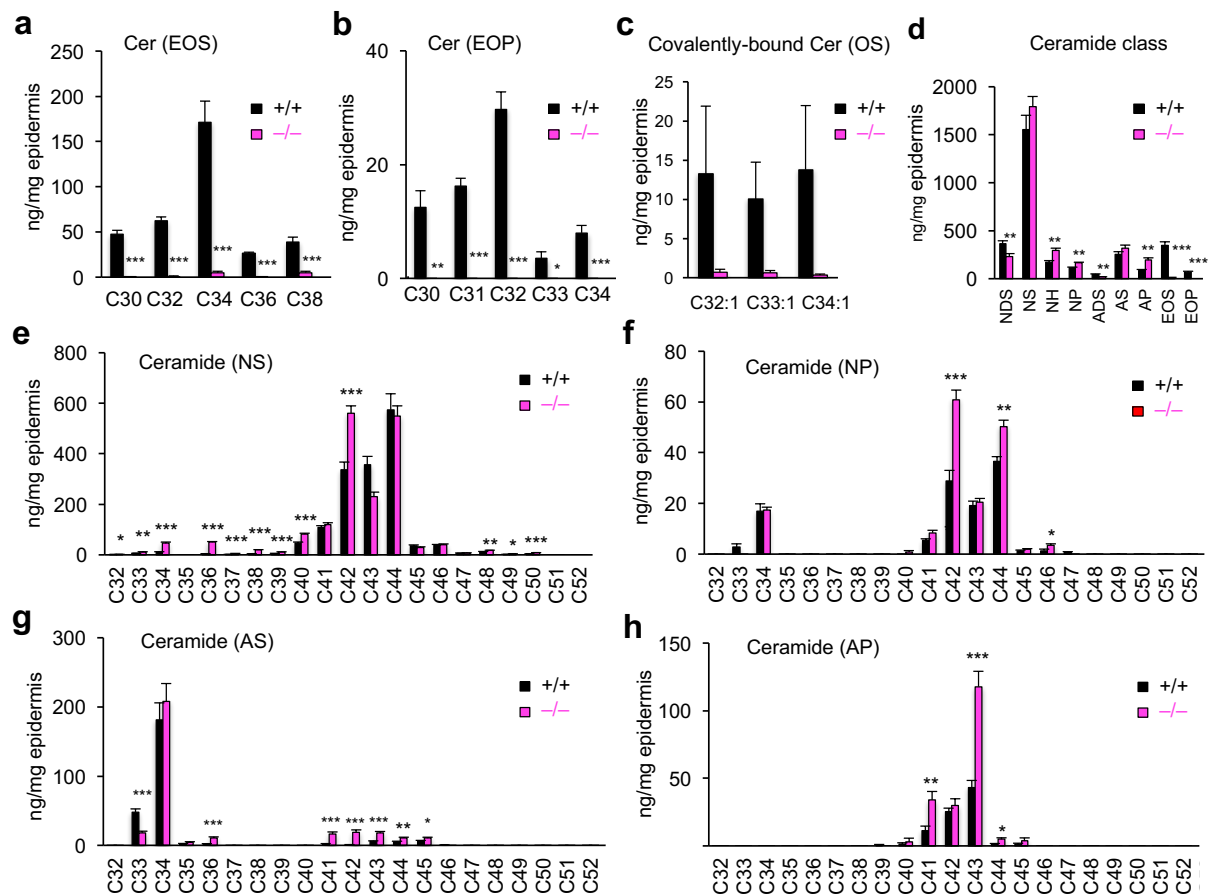

**Supplementary Fig. 4. Effects of *Pnpl1* deletion on epidermal ceramides.**

(a–h) LC-MS/MS quantification of EOS (a), EOP (b), protein-bound Cer OS (c), nine ceramide classes (d), NS (e), NP (f), AS (g), and AP (h) in the epidermis of *Pnpl1*<sup>+/+</sup> and *Pnpl1*<sup>-/-</sup> neonates (mean ± s.e.m., n = 5 animals; \**P* < 0.05, \*\**P* < 0.01 and \*\*\**P* < 0.001 versus *Pnpl1*<sup>+/+</sup> mice in an unpaired, two-tailed Student's *t*-test). Ceramide classes are abbreviated according to three different fatty acid components (N, non-hydroxy fatty acid; A,  $\alpha$ -hydroxy fatty acid; EO, linoleic acid esterified  $\omega$ -hydroxy fatty acid) linked via an amide bond to the sphingoid bases (S, sphingosine; DS, dehydrosphingosine; P, phytosphingosine; H, 6-hydroxysphingosine). Results are from one or two independent experiments.

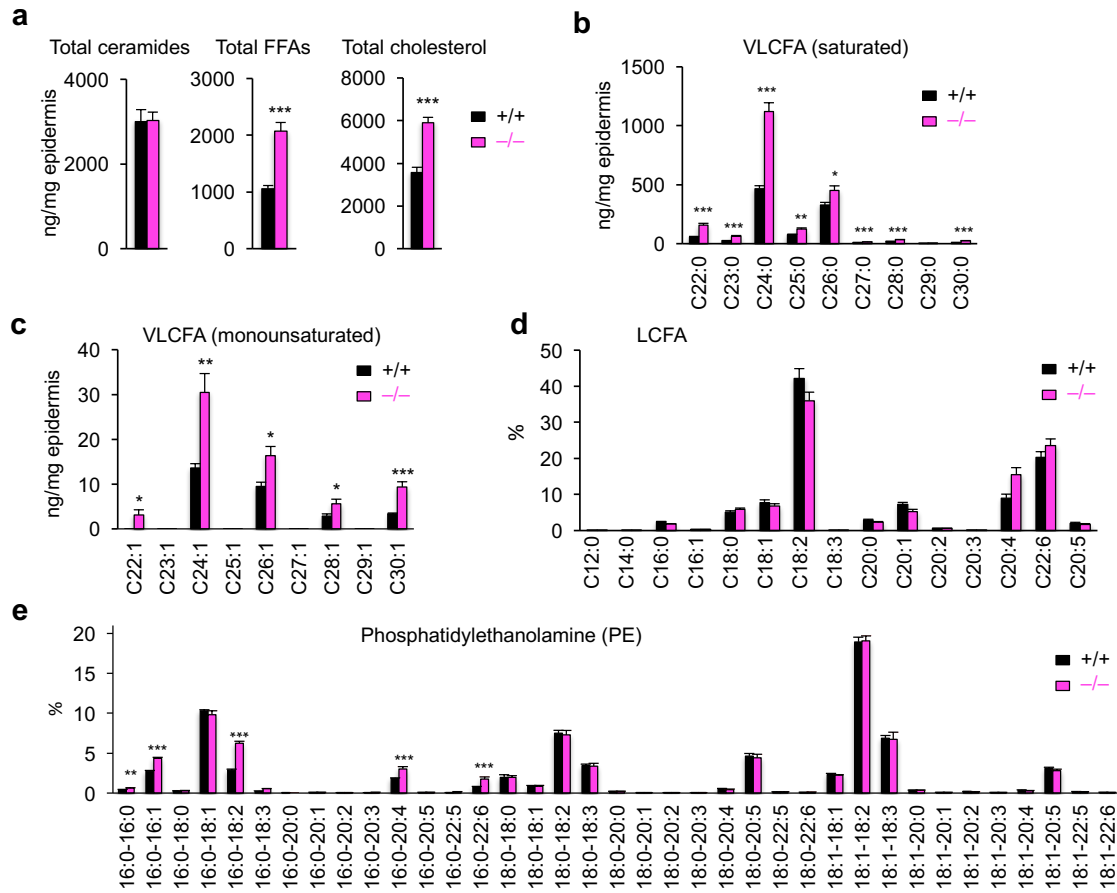

**Supplementary Fig. 5. Effects of *Pnpla1* deletion on epidermal FFAs, cholesterol, and phospholipids.**

(a) Quantification of total contents of ceramides, FFAs, and cholesterol in  $Pnpla^{+/+}$  and  $Pnpla^{-/-}$  neonates by LC-MS. (b–e) Quantification of saturated and monounsaturated forms of VLCFA (b, c), LCFA (d), and phosphatidylethanolamine (e) in the epidermis of  $Pnpla^{+/+}$  and  $Pnpla^{-/-}$  neonates by LC-MS and LC-MS/MS. Data from one or two independent experiments are shown as the mean  $\pm$  s.e.m. (n = 5 animals; \* $P < 0.05$ , \*\* $P < 0.01$  and \*\*\* $P < 0.001$  versus  $Pnpla^{+/+}$  mice in an unpaired, two-tailed Student's *t*-test).

**Supplementary Table 1. Primers for genotyping PCR.**

| Primer name        | Annealing temperature (°C) | Product size (bp) | 5'-3' sequence           |
|--------------------|----------------------------|-------------------|--------------------------|
| <i>Pnpla1</i> WT-F | 59                         | 119               | TGGCCTCTAAGCAAGTGCCCTTGT |
| <i>Pnpla1</i> WT-R |                            |                   | GCAGCTTCTTGTCCCTGCACCTGA |
| <i>Pnpla1</i> KO-F | 59                         | 330               | TCTAAGGCGCATAACGATAC     |
| <i>Pnpla1</i> KO-R |                            |                   | TCCTCATTTGTCTTAGGATGC    |
| <i>Cre</i> -F      | 56.5                       | 281               | CCATCTGCCACCAGCCAG       |
| <i>Cre</i> -R      |                            |                   | TCGCCATCTTCCAGCAGG       |
| <i>Abhd5</i> WT-F  | 57                         | 417               | AGGAGGAGGTGGACTCG        |
| <i>Abhd5</i> COM-R |                            |                   | TTTCACAAAGTTTGCCAGG      |
| <i>Abhd5</i> KO-F  | 57                         | 626               | TCCTCGTGCTTTACGGTATC     |
| <i>Abhd5</i> COM-R |                            |                   | TTTCACAAAGTTTGCCAGG      |

**Supplementary Table 2. Primers and UPL probes for qPCR (mouse).**

| Gene           | Primer sequence             | UPL probe |
|----------------|-----------------------------|-----------|
| <i>Abca12</i>  | CCTGCTAAACCAGACGATCC        | #50       |
|                | ACTTGCACAAAGGGGTTC          |           |
| <i>Abhd5</i>   | ATCTTTGGAGCCCGATCCT         | #89       |
|                | CTTCTGGCTGATCTGCATACAC      |           |
| <i>Alox12b</i> | CTTTGGTCCTGATGGCAAC         | #105      |
|                | GACAATCAGGCCCAGGAGT         |           |
| <i>Aloxe3</i>  | GGCCTCACTGATCTTCAACG        | #4        |
|                | GTCCAGGAGACCTCGAATCTT       |           |
| <i>Cers3</i>   | CATGATATATCTGACATTTGGCTAGAG | #38       |
|                | GTGAAGATGAAGAACAGGGTGTTA    |           |
| <i>Cyp4f39</i> | AAAGAAGAAAGCCAAGAGAATTGA    | #89       |
|                | TGCAACAGGTAGTCGGTGAG        |           |
| <i>Elovl4</i>  | ACGACACCGTGGAGTTCTATC       | #85       |
|                | GCGGCCAGTCTGCTACAC          |           |
| <i>Fabp5</i>   | ACGGCTTTGAGGAGTACATGA       | #46       |
|                | CTCGGTTTTGACCGTGATG         |           |
| <i>Flg</i>     | GGAGGAAGAAACACTGAGCAA       | #96       |
|                | CGATGTCTTGGTCATCTGGA        |           |
| <i>Gba</i>     | GACCAACGCTTGCTGCTAC         | #34       |
|                | ACAGCAATGCCATGAACGTA        |           |
| <i>Hbegf</i>   | TCTTCTTGTCATCGTGGGACT       | #55       |
|                | CACGCCAACTTCACTTTCT         |           |
| <i>Hprt1</i>   | TGATAGATCCATTCCATGACTGTAGA  | #22       |
|                | AAGACATTCTTTCCAGTTAAAGTTGAG |           |
| <i>Krt1</i>    | TGAGCTGAAGAACATGCAAGA       | #31       |
|                | CATGTAAGCTGAATCCACATCC      |           |
| <i>Krt5</i>    | CAGAGCTGAGGAACATGCAG        | #22       |
|                | CATTCTCAGCCGTGGTACG         |           |
| <i>Krt6a</i>   | GCCAAGGCAGACAGTCTAACA       | #55       |
|                | CAGGCTACGGTTGTTGTCC         |           |
| <i>Krt6b</i>   | GGAAATTGCCACCTACAGGA        | #12       |
|                | GGTGGACTGCACCACAGAG         |           |
| <i>Lor</i>     | GGTTGCAACGGAGACAACA         | #11       |
|                | CATGAGAAAGTTAAGCCCATCG      |           |
| <i>Pnpl1</i>   | TGCGGGATTGAGATGGAG          | #94       |
|                | CGCATCATCTGTACCATCTTG       |           |
| <i>Ppard</i>   | ATGGGGGACCAGAACACAC         | #11       |
|                | GGAGGAATTCTGGGAGAGGT        |           |
| <i>Ugcg</i>    | AGTTTCAATCCAGAATGATCAGG     | #4        |
|                | CATTCTGAAATTGGCTCACAAAT     |           |

**Supplementary Table 3. Primers and UPL probes for qPCR (human).**

| <i>Gene</i>   | Primer sequence        | UPL probe |
|---------------|------------------------|-----------|
| <i>FLG</i>    | TGCTCCCGAGAAGATCCAT    | #38       |
|               | GGACTCTGAGAGGCGATCTG   |           |
| <i>KRT1</i>   | TCCGCTTGTTGATTTCATCC   | #22       |
|               | ATCAATCTCGGTTGGATTTCG  |           |
| <i>KRT5</i>   | CCACTTGGTGTCCAGAACCT   | #1        |
|               | GCAGATCAAGACCCTCAACAAT |           |
| <i>PNPLA1</i> | TGGTGGTTTCAGAGTTCACG   | #63       |
|               | ACGAAGCAGCTGCAGTATAGG  |           |
| <i>RPL13A</i> | CTGGACCGTCTCAAGGTGTT   | #18       |
|               | GCCCCAGATAGGCAAACCT    |           |
